# Supplementary material for: Dual manipulation of light and shape based on nanoparticle-induced shape memory composites
Source: Royal Society of Chemistry journal article supplement (doi:10.1039/d3tc00557g), 2023-01-01
Supplement: d3tc00557g1.pdf [file d3tc00557g1.pdf]

Supporting Information

Dual manipulation of light and shape based on nanoparticle-induced  
shape memory composites

Mingxia Liu<sup>a,b</sup>, Mingyang Fan<sup>a,b</sup>, Shu Zhu<sup>c</sup>, Weiping Liu<sup>a,d</sup>, Lili Yang<sup>a,\*</sup>,

Dengteng Ge<sup>b</sup>

<sup>a</sup> State Key Laboratory for Modification of Chemical Fibers and Polymer Materials,  
College of Materials Science and Engineering, Donghua University, Shanghai 201620,  
China

<sup>b</sup> State Key Laboratory for Modification of Chemical Fibers and Polymer Materials,  
Institute of Functional Materials, Donghua University, Shanghai 201620, China

<sup>c</sup> Shanghai Collaborative Innovation Center for High Performance Fiber Composites,  
Center for Civil Aviation Composites, Donghua University, Shanghai 201620, China

<sup>d</sup> Center for Composites, COMAC Shanghai Aircraft Manufacturing Co., Ltd, Shanghai  
201620, China

This PDF includes:

Fig. S1-Fig. S9

Captions for videos

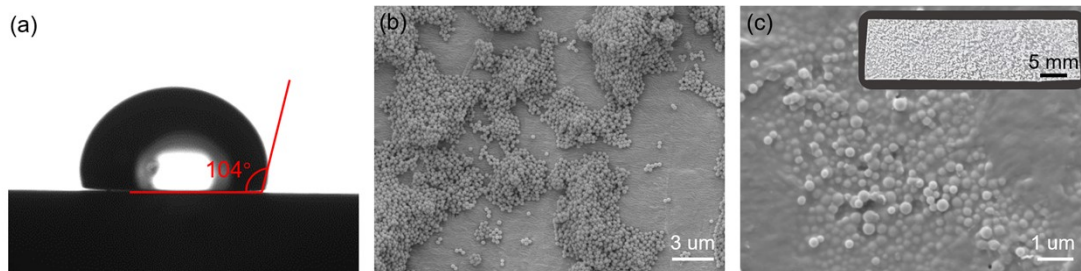

Fig. S1 (a) Water contact angle of PI substrate without fluorination. (b)  $\text{SiO}_2$  NPs are left on PI substrate without fluorination. (c) SEM image and digital photo of complex film peeled off the un-fluorinated PI substrate.

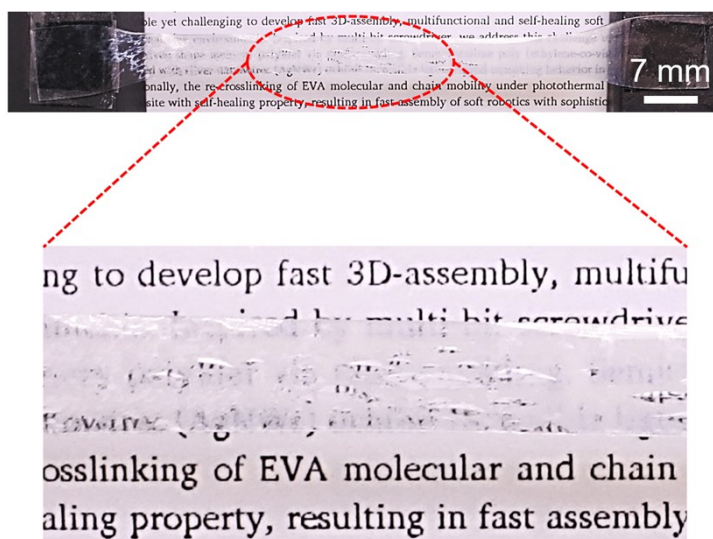

Fig. S2 An inhomogeneous composite film from the casting method.

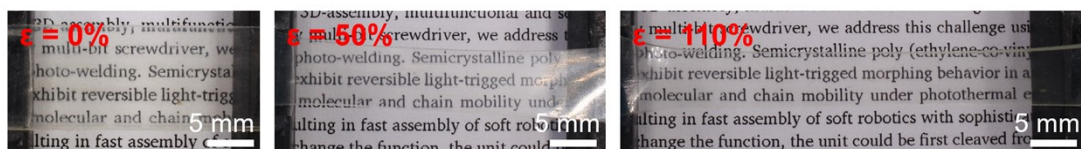

Fig. S3 Optical images of crosslinked EVA film without  $\text{SiO}_2$  NPs at specific strains.

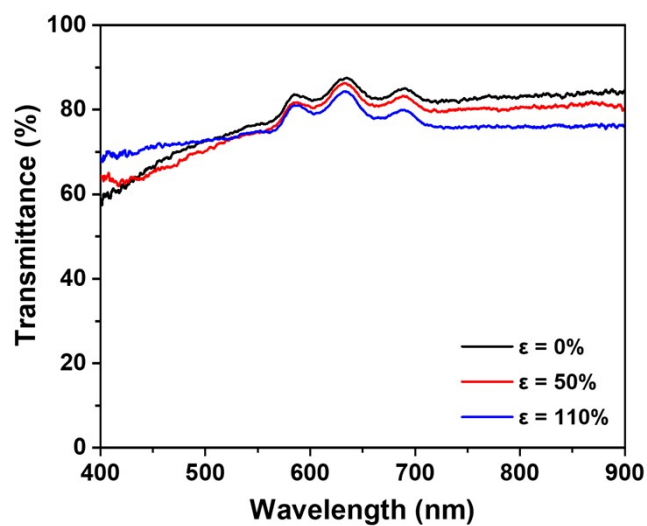

Fig. S4 Transmittance spectra of crosslinked EVA film without SiO<sub>2</sub> NPs upon stretching.

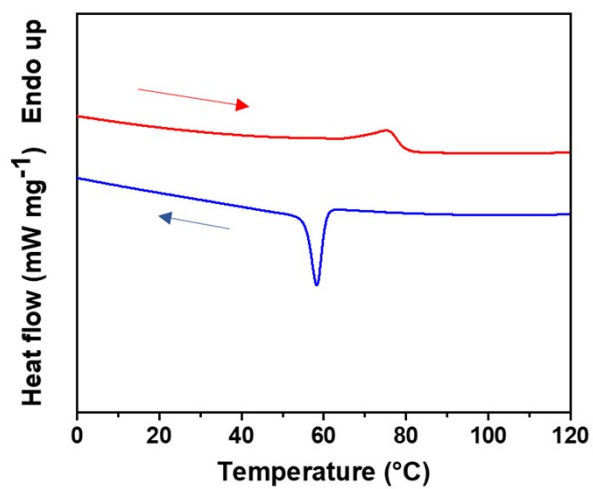

Fig. S5 DSC second heating and cooling curves of SiO<sub>2</sub>/EVA composite films.

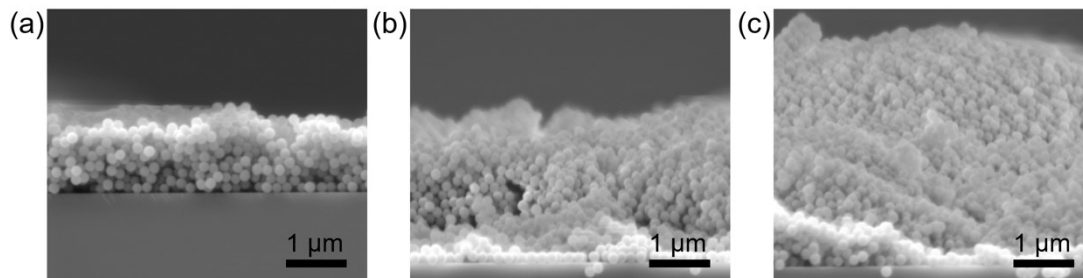

Fig. S6 Cross-sectional SEM images of SiO<sub>2</sub> layer with different spray times, (a) 10 times, (b) 30 times, (c) 50 times.

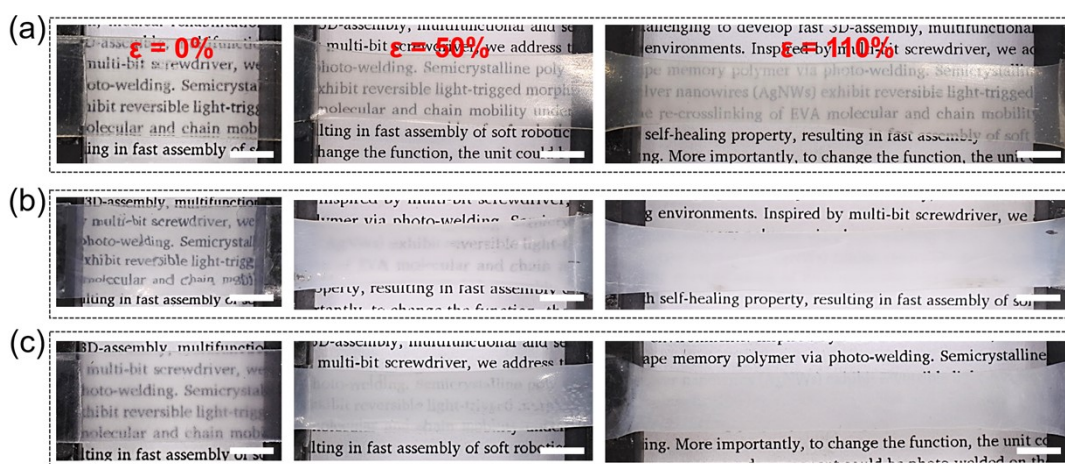

Fig. S7 Optical images of SiO<sub>2</sub>/EVA composite films with different spray times, (a) 10 times, (b) 30 times, (c) 50 times at specific strains. Scale bar: 5 mm.

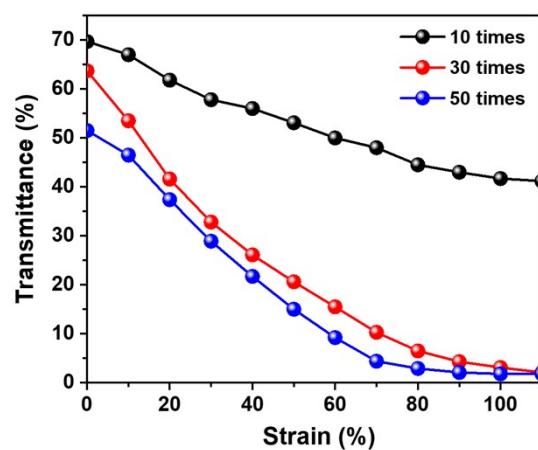

Fig. S8 Transmittance at wavelength of 750 nm of SiO<sub>2</sub>/EVA composite films versus NPs spray times as a function of applied strain.

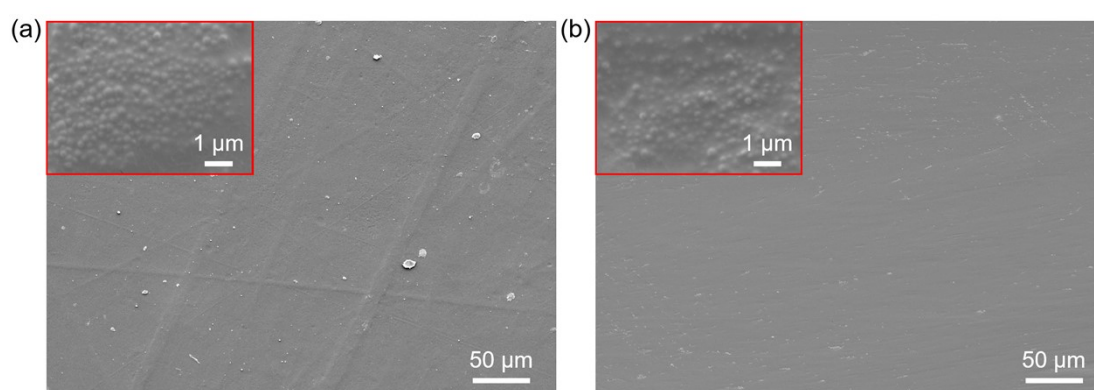

Fig. S9 SEM images of initial state of SiO<sub>2</sub>/EVA composite films in Fig. 3d (a) and Fig. 3e (b).

## Captions for supporting videos

Video S1 Light modulation with the deformation under stretching

Video S2 Reversible transmittance change via thermal-driven shape reconfiguration

Video S3 Demo of SiO<sub>2</sub>/EVA composite films for high temperature warning circuits
